# Supplementary material
Source: publisher site journal article supplement (https://www.kjim.org/upload/media/kjim-2022-084_suppl6.pdf)
Supplement: Supplementary file 1 [file kjim-2022-084_suppl6.pdf]

**Supplementary Table 6. Multidrug-resistant organisms in the infected group**

| Variable          | HAP or VAP (n = 73) | BSI or CLABSI (n = 36) | CAUTI (n = 17) |
|-------------------|---------------------|------------------------|----------------|
| MDR pathogen      | 34 (46.6)           | 14 (38.9)              | 9 (52.9)       |
| ESBL (+) bacteria | 13 (17.8)           | 6 (16.7)               | 6 (35.3)       |
| MRSA              | 0                   | 1 (2.8)                | 0              |
| MRAB              | 21 (28.8)           | 5 (13.9)               | 2 (11.8)       |
| CRPA              | 0                   | 1 (2.8)                | 1 (5.9)        |
| Etc.              | 0                   | 1 (2.8) <sup>a</sup>   | 0              |

Values are presented as number (%).

HAP, hospital acquired pneumonia; VAP, ventilator associated pneumonia; BSI, bloodstream infection; CLABSI, central line-associated bloodstream infection; CAUTI, catheter-associated urinary tract infection; MDR, multidrug-resistant; ESBL, extended-spectrum beta-lactamase; MRSA, methicillin-resistant *Staphylococcus aureus*; MRAB, multidrug-resistant *Acinetobacter baumannii*; CRPA, carbapenem resistant *Pseudomonas aeruginosa*.

<sup>a</sup>Methicillin resistant coagulase negative staphylococci species.
